# Supplementary material for: PI3Kγ Deficient NOD-Mice Are Protected from Diabetes by Restoring the Balance of Regulatory to Effector-T-Cells
Source: PubMed Central journal article supplement (PMC5231340; doi:10.1371/journal.pone.0169695), 2017-01-12
Supplement: pone.0169695.s001.pdf [file pone.0169695.s001.pdf]

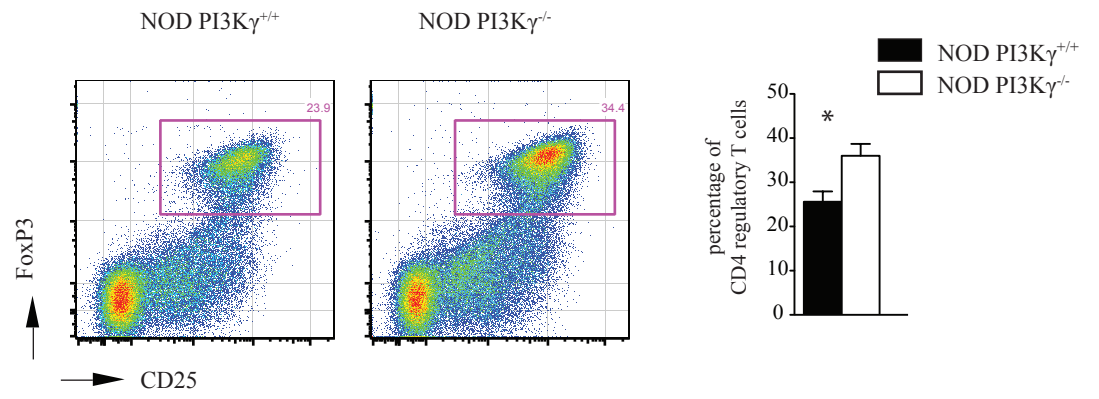

Azzi et al. Supplementary Figure 1
