# Supplementary material for: PI3Kγ Deficient NOD-Mice Are Protected from Diabetes by Restoring the Balance of Regulatory to Effector-T-Cells
Source: PubMed Central journal article supplement (PMC5231340; doi:10.1371/journal.pone.0169695), 2017-01-12
Supplement: pone.0169695.s002.pdf [file pone.0169695.s002.pdf]

# List of the known Idd genes

| <b>IDD gene</b> | <b>Location</b> | <b>Publication</b>                                                                                    |
|-----------------|-----------------|-------------------------------------------------------------------------------------------------------|
| Idd1            | Chromosome 17   | Lyons, Journal of Immunology, 1997                                                                    |
| Idd2            | Chromosome 9    | <a href="http://www.ncbi.nlm.nih.gov/gene/?term=Idd2">http://www.ncbi.nlm.nih.gov/gene/?term=Idd2</a> |
| Idd3            | Chromosome 3    | Lyons, Journal of Immunology, 1997                                                                    |
| Idd4            | Chromosome 11   | <a href="http://www.ncbi.nlm.nih.gov/gene/110675">http://www.ncbi.nlm.nih.gov/gene/110675</a>         |
| Idd5            | Chromosome 1    | <a href="http://www.ncbi.nlm.nih.gov/gene/110656">http://www.ncbi.nlm.nih.gov/gene/110656</a>         |
| Idd6            | Chromosome 6    | <a href="http://www.ncbi.nlm.nih.gov/gene/107835">http://www.ncbi.nlm.nih.gov/gene/107835</a>         |
| Idd7            | Chromosome 7    | <a href="http://www.ncbi.nlm.nih.gov/gene/110649">http://www.ncbi.nlm.nih.gov/gene/110649</a>         |
| Idd8            | Chromosome 14   | <a href="http://www.ncbi.nlm.nih.gov/gene/15923">http://www.ncbi.nlm.nih.gov/gene/15923</a>           |
| Idd9            | Chromosome 4    | <a href="http://www.ncbi.nlm.nih.gov/gene/110658">http://www.ncbi.nlm.nih.gov/gene/110658</a>         |
| Idd10           | Chromosome 3    | Lyons, Journal of Immunology, 1997                                                                    |
| Idd11           | Chromosome 4    | <a href="http://www.ncbi.nlm.nih.gov/gene/110713">http://www.ncbi.nlm.nih.gov/gene/110713</a>         |
| Idd12           | Chromosome 14   | <a href="http://www.ncbi.nlm.nih.gov/gene/15909">http://www.ncbi.nlm.nih.gov/gene/15909</a>           |
| Idd13           | Chromosome 2    | <a href="http://www.ncbi.nlm.nih.gov/gene/15910">http://www.ncbi.nlm.nih.gov/gene/15910</a>           |
| Idd14           | Chromosome 13   | <a href="http://www.ncbi.nlm.nih.gov/gene/15911">http://www.ncbi.nlm.nih.gov/gene/15911</a>           |
| Idd15           | Chromosome 5    | <a href="http://www.ncbi.nlm.nih.gov/gene/15912">http://www.ncbi.nlm.nih.gov/gene/15912</a>           |
| Idd16           | Chromosome 17   | Lyons, Journal of Immunology, 1997                                                                    |
| Idd17           | Chromosome 3    | <a href="http://www.ncbi.nlm.nih.gov/gene/15914">http://www.ncbi.nlm.nih.gov/gene/15914</a>           |
| Idd18           | Chromosome 3    | <a href="http://www.ncbi.nlm.nih.gov/gene/110736">http://www.ncbi.nlm.nih.gov/gene/110736</a>         |
| Idd19           | Chromosome 6    | <a href="http://www.ncbi.nlm.nih.gov/gene/15916">http://www.ncbi.nlm.nih.gov/gene/15916</a>           |
| Idd20           | Chromosome 6    | <a href="http://www.ncbi.nlm.nih.gov/gene?term=Idd20">http://www.ncbi.nlm.nih.gov/gene?term=Idd20</a> |
| Idd21           | Chromosome 18   | <a href="http://www.ncbi.nlm.nih.gov/gene/492940">http://www.ncbi.nlm.nih.gov/gene/492940</a>         |
| Idd21.1         | Chromosome 18   | <a href="http://www.ncbi.nlm.nih.gov/gene/100036455">http://www.ncbi.nlm.nih.gov/gene/100036455</a>   |
| Idd21.2         | Chromosome 18   | <a href="http://www.ncbi.nlm.nih.gov/gene/100036335">http://www.ncbi.nlm.nih.gov/gene/100036335</a>   |
| Idd21.3         | Chromosome 18   | <a href="http://www.ncbi.nlm.nih.gov/gene/100035246">http://www.ncbi.nlm.nih.gov/gene/100035246</a>   |
| Idd22           | Chromosome 8    |                                                                                                       |
| Idd23           | Chromosome 17   | <a href="http://www.ncbi.nlm.nih.gov/gene?term=Idd23">http://www.ncbi.nlm.nih.gov/gene?term=Idd23</a> |
| Idd25           | Chromosome 4    |                                                                                                       |
| Idd26           | Chromosome 1    |                                                                                                       |
| Idd27           | Chromosome 7    |                                                                                                       |
| Pik3cg          | Chromosome 12   | <a href="http://www.ncbi.nlm.nih.gov/gene/30955">http://www.ncbi.nlm.nih.gov/gene/30955</a>           |
