# Supplementary material for: PI3Kγ Deficient NOD-Mice Are Protected from Diabetes by Restoring the Balance of Regulatory to Effector-T-Cells
Source: PubMed Central journal article supplement (PMC5231340; doi:10.1371/journal.pone.0169695), 2017-01-12
Supplement: pone.0169695.s003.pdf [file pone.0169695.s003.pdf]

## **Marker-Assisted Accelerated Backcrossing (MAX-BAX®)** **Service used from Charles River**

### **MAX-BAX® Technology**

Congenic strains are essential tools in biomedical research that allow reduction of genetic variability as they are identical at all genetic loci except for one; that differing locus is usually the transgene or knockout region of interest. The traditional, random backcrossing methods takes up to 2.5 year and 10 generations to produce a congenic strain. Selectively breeding individuals containing more of the recipient genome from each generation allows for accelerated congenic strain production. Those animals carrying the locus of interest with the highest percentage of recipient versus donor strain DNA are preferentially bred.

Genetic markers mapped to specific locations on each chromosome are used to evaluate strain-specific genomic polymorphism. The MAX-BAXZ technology uses mouse single nucleotide polymorphism (SNP) panel, composed of 384 carefully selected SNP markers. It was designed to maximize polymorphism between common inbred strains and provide even coverage of the mouse genome. Markers are spaced at approximately 7 Mbp intervals, and about half of the markers will be polymorphic between any inbred or outbred strains, allowing the same panel to be used for any donor and recipient strains.

The testing for the 384 SNP marker panel is performed on a microarray platform using robust fluorescence-based SNP genotyping assays. Results yield a defined analysis of the genome in question, and a preferred breeding rank is determined for all test individuals. The entire genome is analyzed at each generation, which may make unexpected genetic variation or breeding errors easier to detect.

| array | Marker | SNP ID  | Chr        | Start (bp) | 591       | 585 | 624 | 623 | 587 | NOD/LtJ | C57BL/6J |
|-------|--------|---------|------------|------------|-----------|-----|-----|-----|-----|---------|----------|
| 1     | 1      | Chr1-1  | rs13475705 | 1          | 5585594   | 1   | 1   | 1   | 1   | 1       | 1        |
| 1     | 2      | Chr1-2  | rs13475709 | 1          | 6646045   | 1   | 1   | 1   | 1   | 1       | 0        |
| 2     | 3      | Chr1-3  | rs13475732 | 1          | 13768325  | 1   | 1   | 1   | 1   | 1       | 0        |
| 2     | 4      | Chr1-4  | rs4222181  | 1          | 20804718  | 1   | 1   | 1   | 1   | 1       | 0        |
| 3     | 5      | Chr1-5  | rs6401470  | 1          | 27672455  | 1   | 1   | 1   | 1   | 1       | 0        |
| 3     | 6      | Chr1-6  | rs4222269  | 1          | 34601201  | 1   | 1   | 1   | 1   | 1       | 0        |
| 4     | 7      | Chr1-7  | rs13475847 | 1          | 45969220  | 1   | 0.5 | 1   | 1   | 1       | 0        |
| 4     | 8      | Chr1-8  | rs32602884 | 1          | 47261017  | 1   | 0.5 | 1   | 1   | 1       | 0        |
| 5     | 9      | Chr1-9  | rs6239834  | 1          | 63358048  | 1   | 0.5 | 0.5 | 0.5 | 1       | 0        |
| 5     | 10     | Chr1-10 | rs13475919 | 1          | 73020555  | 1   | 0.5 | 0.5 | 1   | 1       | 0        |
| 6     | 11     | Chr1-11 | rs13475928 | 1          | 75522038  | 1   | 1   | 1   | 1   | 1       | 1        |
| 6     | 12     | Chr1-12 | rs3698264  | 1          | 79343179  | 1   | 1   | 1   | 1   | 1       | 1        |
| 7     | 13     | Chr1-13 | rs4222516  | 1          | 92678218  | 1   | 1   | 1   | 1   | 1       | 1        |
| 7     | 14     | Chr1-14 | rs13475979 | 1          | 93218895  | 0.5 | 0.5 | 0.5 | 1   | 1       | 0        |
| 8     | 15     | Chr1-15 | rs13476024 | 1          | 105452781 | 0.5 | 0.5 | 0.5 | 1   | 1       | 0        |
| 8     | 16     | Chr1-16 | rs6168275  | 1          | 113643051 | 1   | 1   | 1   | 1   | 1       | 1        |
| 9     | 17     | Chr1-17 | rs13476064 | 1          | 116488503 | 0.5 | 0.5 | 0.5 | 1   | 1       | 0        |
| 65    | 18     | Chr1-18 | rs6242814  | 1          | 118897095 | 1   | 1   | 1   | 1   | 1       | 1        |
| 66    | 19     | Chr1-19 | rs4222623  | 1          | 133564494 | 1   | 1   | 1   | 1   | 1       | 1        |
| 10    | 20     | Chr1-20 | rs13476119 | 1          | 136107291 | 0.5 | 0.5 | 0.5 | 1   | 1       | 0        |
| 67    | 21     | Chr1-21 | rs13476155 | 1          | 146800337 | 1   | 1   | 1   | 1   | 1       | 0        |
| 11    | 22     | Chr1-22 | rs13476192 | 1          | 157761942 | 1   | 1   | 1   | 1   | 1       | 0        |
| 68    | 23     | Chr1-23 | rs13476195 | 1          | 158916123 | 1   | 1   | 1   | 1   | 1       | 0        |
| 12    | 24     | Chr1-24 | rs13476223 | 1          | 169640436 | 1   | 1   | 1   | 1   | 1       | 0        |
| 69    | 25     | Chr1-25 | rs3022871  | 1          | 174888139 | 1   | 1   | 1   | 1   | 1       | 0        |
| 13    | 26     | Chr1-26 | rs13476267 | 1          | 182213911 | 1   | 1   | 1   | 1   | 1       | 1        |
| 14    | 27     | Chr1-27 | rs13476286 | 1          | 187711002 | 1   | 1   | 1   | 1   | 1       | 0        |
| 70    | 28     | Chr1-28 | rs13476294 | 1          | 190268439 | 1   | 1   | 1   | 1   | 1       | 0        |
| 71    | 29     | Chr2-1  | rs13476337 | 2          | 7991482   | 1   | 1   | 1   | 1   | 1       | 0        |
| 15    | 30     | Chr2-2  | rs13476344 | 2          | 9314267   | 1   | 1   | 1   | 1   | 1       | 1        |
| 16    | 31     | Chr2-3  | rs13476350 | 2          | 11707492  | 1   | 1   | 1   | 1   | 1       | 1        |
| 17    | 32     | Chr2-4  | rs6407520  | 2          | 20299013  | 1   | 1   | 1   | 1   | 1       | 0        |
| 72    | 33     | Chr2-5  | rs13476383 | 2          | 23294859  | 1   | 1   | 1   | 1   | 1       | 1        |
| 129   | 34     | Chr2-6  | rs33640786 | 2          | 36540166  | 1   | 1   | 1   | 1   | 1       | 0        |
| 18    | 35     | Chr2-7  | rs13476465 | 2          | 43647240  | 1   | 1   | 1   | 1   | 1       | 1        |
| 19    | 36     | Chr2-8  | rs6265423  | 2          | 47020132  | 1   | 1   | 1   | 1   | 1       | 0        |
| 130   | 37     | Chr2-9  | rs13476491 | 2          | 50808753  | 1   | 1   | 1   | 1   | 1       | 0        |
| 20    | 38     | Chr2-10 | rs13476537 | 2          | 62483559  | 1   | 1   | 1   | 1   | 1       | 0        |
| 131   | 39     | Chr2-11 | rs6314726  | 2          | 63950900  | 1   | 1   | 1   | 1   | 1       | 0        |
| 21    | 40     | Chr2-12 | rs6353593  | 2          | 68262871  | 1   | 1   | 1   | 1   | 1       | 0        |
| 132   | 41     | Chr2-13 | rs13476583 | 2          | 75747539  | 1   | 1   | 1   | 1   | 1       | 1        |
| 22    | 42     | Chr2-14 | rs13476621 | 2          | 87193247  | 1   | 1   | 1   | 1   | 1       | 0        |
| 133   | 43     | Chr2-15 | rs6170908  | 2          | 94377940  | 1   | 1   | 1   | 1   | 1       | 0        |
| 23    | 44     | Chr2-16 | rs13476689 | 2          | 107305294 | 1   | 1   | 1   | 1   | 1       | 0        |
| 134   | 45     | Chr2-17 | rs4223383  | 2          | 109740681 | 1   | 1   | 1   | 1   | 1       | 0        |
| 135   | 46     | Chr2-18 | rs3022895  | 2          | 119407520 | 1   | 1   | 1   | 1   | 1       | 0        |
| 24    | 47     | Chr2-19 | rs13476740 | 2          | 121412769 | 1   | 1   | 1   | 1   | 1       | 1        |
| 136   | 48     | Chr2-20 | rs13465151 | 2          | 130507288 | 1   | 1   | 1   | 1   | 1       | 1        |
| 25    | 49     | Chr2-21 | rs13476787 | 2          | 134965497 | 1   | 1   | 1   | 1   | 1       | 0        |
| 9     | 50     | Chr2-22 | rs3022909  | 2          | 145107384 | 1   | 1   | 1   | 1   | 1       | 1        |
| 26    | 51     | Chr2-23 | rs13476846 | 2          | 152857172 | 1   | 1   | 1   | 1   | 1       | 0        |
| 10    | 52     | Chr2-24 | rs6204809  | 2          | 161566039 | 1   | 1   | 1   | 1   | 1       | 1        |
| 27    | 53     | Chr2-25 | rs13476894 | 2          | 165876927 | 1   | 1   | 1   | 1   | 1       | 0        |
| 11    | 54     | Chr2-26 | rs13476923 | 2          | 172651890 | 1   | 1   | 1   | 1   | 1       | 1        |
| 28    | 55     | Chr3-1  | rs13476950 | 3          | 3785419   | 1   | 1   | 1   | 1   | 1       | 1        |
| 12    | 56     | Chr3-2  | rs13476956 | 3          | 5370727   | 1   | 1   | 1   | 1   | 1       | 0        |
| 13    | 57     | Chr3-3  | rs6410894  | 3          | 19731453  | 1   | 1   | 1   | 1   | 1       | 0        |
| 29    | 58     | Chr3-4  | rs13477017 | 3          | 22507002  | 1   | 1   | 1   | 1   | 1       | 1        |
| 14    | 59     | Chr3-5  | rs6371982  | 3          | 34034360  | 1   | 1   | 1   | 1   | 1       | 1        |
| 30    | 60     | Chr3-6  | rs13477089 | 3          | 46190285  | 1   | 1   | 1   | 1   | 1       | 0        |
| 31    | 61     | Chr3-7  | rs13477113 | 3          | 53073655  | 1   | 1   | 1   | 1   | 1       | 0        |
| 15    | 62     | Chr3-8  | rs13477160 | 3          | 64739341  | 1   | 1   | 1   | 1   | 1       | 1        |
| 32    | 63     | Chr3-9  | rs13477200 | 3          | 75061692  | 1   | 1   | 1   | 1   | 1       | 0        |
| 16    | 64     | Chr3-10 | rs4223998  | 3          | 78920216  | 1   | 1   | 1   | 1   | 1       | 0        |
| 33    | 65     | Chr3-11 | rs13477251 | 3          | 88658602  | 1   | 1   | 1   | 1   | 1       | 1        |
| 73    | 66     | Chr3-12 | rs13477256 | 3          | 90488442  | 1   | 1   | 1   | 1   | 1       | 0        |
| 34    | 67     | Chr3-13 | rs13459184 | 3          | 94926333  | 1   | 1   | 1   | 1   | 1       | 0        |
| 74    | 68     | Chr3-14 | rs13459070 | 3          | 104607548 | 1   | 1   | 1   | 1   | 1       | 1        |
| 35    | 69     | Chr3-15 | rs13477351 | 3          | 114211027 | 1   | 1   | 1   | 1   | 1       | 0        |
| 75    | 70     | Chr3-16 | rs13477364 | 3          | 118290075 | 1   | 1   | 1   | 1   | 1       | 0        |
| 36    | 71     | Chr3-17 | rs4221957  | 3          | 129527944 | 1   | 1   | 1   | 1   | 1       | 1        |
| 76    | 72     | Chr3-18 | rs13477433 | 3          | 136253587 | 0.5 | 1   | 1   | 0.5 | 1       | 0        |
| 77    | 73     | Chr3-19 | rs30057041 | 3          | 146256384 | 0.5 | 1   | 1   | 0.5 | 1       | 0        |
| 37    | 74     | Chr3-20 | rs30213296 | 3          | 148269916 | 0.5 | 1   | 1   | 0.5 | 1       | 0        |
| 78    | 75     | Chr3-21 | rs13477512 | 3          | 156610793 | 0.5 | 1   | 1   | 0.5 | 1       | 0        |
| 38    | 76     | Chr3-22 | rs13477528 | 3          | 159475020 | 0.5 | 1   | 1   | 0.5 | 1       | 0        |
| 79    | 77     | Chr4-1  | rs13477541 | 4          | 6320883   | 1   | 1   | 1   | 1   | 1       | 0        |
| 39    | 78     | Chr4-2  | rs13477561 | 4          | 11507153  | 1   | 1   | 1   | 1   | 1       | 0        |
| 80    | 79     | Chr4-3  | rs32479301 | 4          | 21218277  | 1   | 1   | 1   | 1   | 1       | 0        |

| array | Marker | SNP ID  | Chr        | Start (bp) | 591       | 585 | 624 | 623 | 587 | NOD/LtJ | C57BL/6J |
|-------|--------|---------|------------|------------|-----------|-----|-----|-----|-----|---------|----------|
| 137   | 80     | Chr4-4  | rs13477633 | 4          | 33094104  | 1   | 1   | 1   | 1   | 1       | 1        |
| 40    | 81     | Chr4-5  | rs13459075 | 4          | 41664425  | 1   | 1   | 1   | 1   | 1       | 1        |
| 138   | 82     | Chr4-6  | rs3706700  | 4          | 49109938  | 1   | 1   | 1   | 1   | 1       | 1        |
| 41    | 83     | Chr4-7  | rs6204339  | 4          | 51949195  | 1   | 1   | 1   | 1   | 1       | 0        |
| 42    | 84     | Chr4-8  | rs13477724 | 4          | 57442782  | 1   | 1   | 1   | 1   | 1       | 1        |
| 139   | 85     | Chr4-9  | rs6374954  | 4          | 63036830  | 1   | 1   | 0.5 | 1   | 1       | 0        |
| 43    | 86     | Chr4-10 | rs13477743 | 4          | 64461467  | nr  | nr  | nr  | nr  | 1       | 0        |
| 140   | 87     | Chr4-11 | rs16265    | 4          | 77612028  | 1   | 1   | 1   | 1   | 1       | 1        |
| 44    | 88     | Chr4-12 | rs13477799 | 4          | 79853958  | 1   | 1   | 1   | 1   | 1       | 1        |
| 141   | 89     | Chr4-13 | rs6206306  | 4          | 90175455  | 1   | 1   | 1   | 1   | 1       | 0        |
| 45    | 90     | Chr4-14 | rs13477859 | 4          | 96869172  | 1   | 1   | 1   | 1   | 1       | 0        |
| 142   | 91     | Chr4-15 | rs6324470  | 4          | 105650718 | 1   | 1   | 1   | 1   | 1       | 0        |
| 46    | 92     | Chr4-16 | rs6381371  | 4          | 115708649 | 1   | 1   | 1   | 1   | 1       | 0        |
| 143   | 93     | Chr4-17 | rs13477947 | 4          | 120691835 | 1   | 1   | 1   | 1   | 1       | 0        |
| 47    | 94     | Chr4-18 | rs13477970 | 4          | 127258946 | 1   | 1   | 1   | 1   | 1       | 1        |
| 48    | 95     | Chr4-19 | rs13459077 | 4          | 132419164 | 1   | 1   | 0.5 | 1   | 1       | 0        |
| 144   | 96     | Chr4-20 | rs4224824  | 4          | 135004661 | 1   | 1   | 0.5 | 1   | 1       | 1        |
| 49    | 97     | Chr4-21 | rs13478014 | 4          | 138566497 | 1   | 1   | 1   | 1   | 1       | 1        |
| 17    | 98     | Chr4-22 | rs4224947  | 4          | 149023755 | 1   | 1   | 1   | 1   | 1       | 0        |
| 50    | 99     | Chr4-23 | rs13478063 | 4          | 152699720 | 1   | 1   | 1   | 1   | 1       | 0        |
| 18    | 100    | Chr4-24 | rs13478076 | 4          | 155236792 | 1   | 1   | 1   | 1   | 1       | 1        |
| 19    | 101    | Chr5-1  | rs6245801  | 5          | 7461340   | 1   | 1   | 1   | 1   | 1       | 0        |
| 51    | 102    | Chr5-2  | rs13481342 | 5          | 12837850  | 1   | 1   | 1   | 1   | 1       | 0        |
| 20    | 103    | Chr5-3  | rs13478131 | 5          | 20532162  | 1   | 1   | 1   | 1   | 1       | 0        |
| 52    | 104    | Chr5-4  | rs3023621  | 5          | 28888081  | 1   | 1   | 1   | 1   | 1       | 0        |
| 21    | 105    | Chr5-5  | rs13478174 | 5          | 33329619  | 1   | 1   | 1   | 1   | 1       | 1        |
| 53    | 106    | Chr5-6  | rs6276465  | 5          | 42600456  | nr  | nr  | nr  | nr  | 1       | 1        |
| 22    | 107    | Chr5-7  | rs3023045  | 5          | 50966233  | 1   | 1   | 1   | 1   | 1       | 0        |
| 54    | 108    | Chr5-8  | rs13478269 | 5          | 58107090  | 1   | 1   | 1   | 1   | 1       | 0        |
| 23    | 109    | Chr5-9  | rs13478311 | 5          | 68029080  | 1   | 1   | 1   | 1   | 1       | 0        |
| 55    | 110    | Chr5-10 | rs6235071  | 5          | 73033762  | 1   | 1   | 1   | 1   | 1       | 0        |
| 24    | 111    | Chr5-11 | rs13478339 | 5          | 78253018  | 1   | 1   | 1   | 1   | 1       | 0        |
| 56    | 112    | Chr5-12 | rs3688741  | 5          | 86787409  | 1   | 1   | 1   | 1   | 1       | 0        |
| 81    | 113    | Chr5-13 | rs13478391 | 5          | 91904489  | 1   | 1   | 1   | 1   | 1       | 0        |
| 57    | 114    | Chr5-14 | rs13478419 | 5          | 100829662 | 1   | 1   | 1   | 1   | 1       | 1        |
| 82    | 115    | Chr5-15 | rs13478434 | 5          | 104572764 | 1   | 1   | 1   | 1   | 1       | 1        |
| 58    | 116    | Chr5-16 | rs13478473 | 5          | 114660997 | 1   | 1   | 1   | 1   | 1       | 1        |
| 83    | 117    | Chr5-17 | rs13478487 | 5          | 119758227 | 1   | 1   | 1   | 1   | 1       | 1        |
| 59    | 118    | Chr5-18 | rs13478499 | 5          | 123738720 | 0.5 | 1   | 1   | 0.5 | 1       | 0        |
| 84    | 119    | Chr5-19 | rs13478533 | 5          | 131210820 | 1   | 1   | 1   | 1   | 1       | 0        |
| 60    | 120    | Chr5-20 | rs13478547 | 5          | 137222873 | 1   | 1   | 1   | 1   | 1       | 0        |
| 85    | 121    | Chr5-21 | rs3023062  | 5          | 145631811 | 1   | 1   | 1   | 1   | 1       | 1        |
| 61    | 122    | Chr5-22 | rs13478595 | 5          | 151148537 | 1   | 1   | 1   | 1   | 1       | 0        |
| 86    | 123    | Chr6-1  | rs6206775  | 6          | 7458991   | 1   | 1   | 1   | 1   | 1       | 1        |
| 62    | 124    | Chr6-2  | rs13478641 | 6          | 16011005  | 1   | 1   | 1   | 1   | 1       | 0        |
| 87    | 125    | Chr6-3  | rs13478656 | 6          | 21893927  | 1   | 1   | 1   | 1   | 1       | 0        |
| 63    | 126    | Chr6-4  | rs6218880  | 6          | 25230499  | 1   | 1   | 1   | 1   | 1       | 0        |
| 88    | 127    | Chr6-5  | rs13478698 | 6          | 32910258  | 1   | 1   | 1   | 1   | 1       | 0        |
| 64    | 128    | Chr6-6  | rs6238771  | 6          | 45196664  | 1   | 1   | 1   | 1   | 1       | 0        |
| 145   | 129    | Chr6-7  | rs13478754 | 6          | 51720316  | 1   | 1   | 1   | 1   | 1       | 1        |
| 65    | 130    | Chr6-8  | rs13478768 | 6          | 55504762  | 1   | 1   | 1   | 1   | 1       | 0        |
| 146   | 131    | Chr6-9  | rs13478785 | 6          | 60941037  | 1   | 1   | 1   | 1   | 1       | 1        |
| 66    | 132    | Chr6-10 | rs6246241  | 6          | 71720626  | 1   | 1   | 1   | 1   | 1       | 0        |
| 147   | 133    | Chr6-11 | rs13478834 | 6          | 76774055  | 1   | 1   | 1   | 1   | 1       | 1        |
| 67    | 134    | Chr6-12 | rs30216797 | 6          | 84079021  | 1   | 1   | 1   | 1   | 1       | 1        |
| 148   | 135    | Chr6-13 | rs13478887 | 6          | 91019207  | 1   | 1   | 1   | 1   | 1       | 0        |
| 68    | 136    | Chr6-14 | rs13478917 | 6          | 97419188  | 1   | 1   | 1   | 1   | 1       | 0        |
| 149   | 137    | Chr6-15 | rs6292642  | 6          | 104503229 | 1   | 1   | 1   | 1   | 1       | 1        |
| 69    | 138    | Chr6-16 | rs13478979 | 6          | 113251663 | 1   | 1   | 1   | 1   | 1       | 0        |
| 150   | 139    | Chr6-17 | rs13479001 | 6          | 119516194 | 1   | 1   | 1   | 1   | 1       | 1        |
| 70    | 140    | Chr6-18 | rs13479044 | 6          | 131637351 | 1   | 1   | 1   | 1   | 1       | 1        |
| 151   | 141    | Chr6-19 | rs4226318  | 6          | 133057628 | 1   | 0.5 | 0.5 | 0.5 | 1       | 0        |
| 71    | 142    | Chr6-20 | rs13479078 | 6          | 139834735 | 1   | 1   | 1   | 1   | 1       | 0        |
| 152   | 143    | Chr6-21 | rs3090690  | 6          | 146408574 | 1   | 1   | 1   | 1   | 1       | 0        |
| 72    | 144    | Chr6-22 | rs6328711  | 6          | 148826464 | 1   | 1   | 1   | 1   | 1       | 1        |
| 25    | 145    | Chr7-1  | rs13479114 | 7          | 7092609   | 1   | 1   | 1   | 1   | 1       | 0        |
| 73    | 146    | Chr7-2  | rs13479137 | 7          | 16488107  | 1   | 1   | 1   | 1   | 1       | 1        |
| 26    | 147    | Chr7-3  | rs13479145 | 7          | 19988355  | 1   | 1   | 1   | 1   | 1       | 0        |
| 74    | 148    | Chr7-4  | rs13479175 | 7          | 31087252  | 1   | 1   | 1   | 1   | 1       | 1        |
| 27    | 149    | Chr7-5  | rs6239372  | 7          | 35483870  | 1   | 1   | 1   | 1   | 1       | 0        |
| 75    | 150    | Chr7-6  | rs6206014  | 7          | 47861154  | 1   | 1   | 1   | 1   | 1       | 0        |
| 28    | 151    | Chr7-7  | rs13479233 | 7          | 55071694  | 1   | 1   | 1   | 1   | 1       | 0        |
| 76    | 152    | Chr7-8  | rs13479271 | 7          | 64748561  | 1   | 1   | 1   | 1   | 1       | 1        |
| 29    | 153    | Chr7-9  | rs13479292 | 7          | 69695364  | 1   | 1   | 1   | 1   | 1       | 1        |
| 77    | 154    | Chr7-10 | rs13479342 | 7          | 82114282  | 1   | 1   | 1   | 1   | 1       | 0        |
| 30    | 155    | Chr7-11 | rs6373032  | 7          | 83914252  | 1   | 1   | 1   | 1   | 1       | 1        |
| 78    | 156    | Chr7-12 | rs6344724  | 7          | 91156584  | 1   | 1   | 1   | 1   | 1       | 0        |
| 31    | 157    | Chr7-13 | rs13479402 | 7          | 99329410  | 1   | 1   | 1   | 1   | 1       | 1        |
| 79    | 158    | Chr7-14 | rs13479413 | 7          | 102506944 | 1   | 1   | 1   | 1   | 1       | 0        |

| array | Marker | SNP ID   | Chr        | Start (bp) | 591       | 585 | 624 | 623 | 587 | NOD/LtJ | C57BL/6J |
|-------|--------|----------|------------|------------|-----------|-----|-----|-----|-----|---------|----------|
| 32    | 159    | Chr7-15  | rs6357312  | 7          | 109389815 | 1   | 1   | 1   | 1   | 1       | 1        |
| 80    | 160    | Chr7-16  | rs13479469 | 7          | 121418263 | 1   | 1   | 1   | 1   | 1       | 0        |
| 89    | 161    | Chr7-17  | rs13459101 | 7          | 125673109 | 1   | 1   | 1   | 1   | 1       | 1        |
| 81    | 162    | Chr7-18  | rs6252075  | 7          | 134800915 | 1   | 1   | 0.5 | 0.5 | 1       | 0        |
| 90    | 163    | Chr7-19  | rs13479537 | 7          | 140062817 | 1   | 1   | 1   | 1   | 1       | 1        |
| 82    | 164    | Chr7-20  | rs13479556 | 7          | 145553382 | 1   | 1   | 1   | 1   | 1       | 0        |
| 91    | 165    | Chr7-21  | rs4226997  | 7          | 152082670 | 1   | 1   | 1   | 1   | 1       | 0        |
| 83    | 166    | Chr7-22  | rs13479572 | 7          | 152494066 | 1   | 1   | 1   | 1   | 1       | 0        |
| 92    | 167    | Chr8-1   | rs13479602 | 8          | 9252746   | 1   | 1   | 1   | 1   | 1       | 1        |
| 84    | 168    | Chr8-2   | rs30244710 | 8          | 15526052  | 1   | 1   | 1   | 1   | 1       | 0        |
| 93    | 169    | Chr8-3   | rs13479633 | 8          | 19452131  | 1   | 1   | 1   | 1   | 1       | 0        |
| 85    | 170    | Chr8-4   | rs13479641 | 8          | 24972916  | 1   | 1   | 1   | 1   | 1       | 1        |
| 86    | 171    | Chr8-5   | rs13479681 | 8          | 32848679  | 1   | 1   | 1   | 1   | 1       | 0        |
| 94    | 172    | Chr8-6   | rs32612161 | 8          | 34056457  | 1   | 1   | 1   | 1   | 1       | 0        |
| 87    | 173    | Chr8-7   | rs13479694 | 8          | 35274784  | 1   | 1   | 1   | 1   | 1       | 0        |
| 95    | 174    | Chr8-8   | rs13479752 | 8          | 51299032  | 1   | 1   | 1   | 1   | 1       | 1        |
| 88    | 175    | Chr8-9   | rs13479785 | 8          | 61639733  | 1   | 1   | 1   | 1   | 1       | 0        |
| 89    | 176    | Chr8-10  | rs13479807 | 8          | 68141750  | 1   | 1   | 1   | 1   | 1       | 0        |
| 96    | 177    | Chr8-11  | rs13479815 | 8          | 71137663  | 1   | 1   | 1   | 1   | 1       | 0        |
| 153   | 178    | Chr8-12  | rs4227253  | 8          | 77650956  | 1   | 1   | 1   | 1   | 1       | 1        |
| 90    | 179    | Chr8-13  | rs13479865 | 8          | 86257018  | 1   | 1   | 1   | 1   | 1       | 0        |
| 154   | 180    | Chr8-14  | rs13479892 | 8          | 90842707  | 1   | 1   | 1   | 1   | 1       | 0        |
| 91    | 181    | Chr8-15  | rs13479948 | 8          | 102254876 | 1   | 1   | 1   | 1   | 1       | 0        |
| 155   | 182    | Chr8-16  | rs13479961 | 8          | 105921528 | 1   | 1   | 1   | 1   | 1       | 1        |
| 92    | 183    | Chr8-17  | rs6409975  | 8          | 118561265 | 1   | 1   | 1   | 1   | 1       | 1        |
| 156   | 184    | Chr8-18  | rs13480010 | 8          | 119637332 | 1   | 1   | 1   | 1   | 1       | 0        |
| 93    | 185    | Chr8-19  | rs13480031 | 8          | 127756867 | 1   | 1   | 1   | 1   | 1       | 0        |
| 157   | 186    | Chr8-20  | rs13480045 | 8          | 130889097 | 1   | 1   | 1   | 1   | 1       | 1        |
| 158   | 187    | Chr9-1   | rs6167568  | 9          | 6643072   | 1   | 1   | 1   | 1   | 1       | 1        |
| 94    | 188    | Chr9-2   | rs4137000  | 9          | 13259371  | 1   | 1   | 1   | 1   | 1       | 0        |
| 159   | 189    | Chr9-3   | rs6181976  | 9          | 23780477  | 1   | 1   | 1   | 1   | 1       | 1        |
| 95    | 190    | Chr9-4   | rs6222175  | 9          | 31523010  | 1   | 1   | 1   | 1   | 1       | 1        |
| 160   | 191    | Chr9-5   | rs30435524 | 9          | 34769349  | 1   | 1   | 1   | 1   | 1       | 1        |
| 96    | 192    | Chr9-6   | rs13480166 | 9          | 43879831  | 1   | 1   | 1   | 1   | 1       | 0        |
| 33    | 193    | Chr9-7   | rs3023210  | 9          | 48612132  | 1   | 1   | 1   | 1   | 1       | 0        |
| 97    | 194    | Chr9-8   | rs13480205 | 9          | 54377877  | 1   | 1   | 1   | 1   | 1       | 0        |
| 34    | 195    | Chr9-9   | rs13480238 | 9          | 63420684  | 1   | 1   | 1   | 1   | 1       | 0        |
| 98    | 196    | Chr9-10  | rs13480264 | 9          | 70338300  | 1   | 1   | 1   | 1   | 1       | 0        |
| 35    | 197    | Chr9-11  | rs6299479  | 9          | 75526199  | 1   | 1   | 1   | 1   | 1       | 1        |
| 99    | 198    | Chr9-12  | rs13480317 | 9          | 85678310  | 1   | 1   | 1   | 1   | 1       | 1        |
| 36    | 199    | Chr9-13  | rs33103151 | 9          | 90578038  | 1   | 1   | 1   | 1   | 1       | 1        |
| 100   | 200    | Chr9-14  | rs13480382 | 9          | 102330061 | 1   | 1   | 0.5 | 1   | 1       | 0        |
| 37    | 201    | Chr9-15  | rs13480400 | 9          | 106550262 | 1   | 1   | 1   | 1   | 1       | 0        |
| 101   | 202    | Chr9-16  | rs13480428 | 9          | 113200235 | 1   | 1   | 1   | 1   | 1       | 0        |
| 38    | 203    | Chr9-17  | rs6372658  | 9          | 117873471 | 1   | 1   | 1   | 1   | 1       | 1        |
| 102   | 204    | Chr9-18  | rs6299531  | 9          | 122834341 | 1   | 1   | 1   | 1   | 1       | 1        |
| 39    | 205    | Chr10-1  | rs13480488 | 10         | 8964116   | 1   | 1   | 1   | 1   | 1       | 1        |
| 103   | 206    | Chr10-2  | rs13480510 | 10         | 15801686  | 1   | 1   | 1   | 1   | 1       | 1        |
| 40    | 207    | Chr10-3  | rs13459119 | 10         | 20045489  | 1   | 1   | 1   | 1   | 1       | 0        |
| 104   | 208    | Chr10-4  | rs13480570 | 10         | 30725948  | 1   | 1   | 1   | 1   | 1       | 0        |
| 97    | 209    | Chr10-5  | rs13480581 | 10         | 38685357  | 1   | 1   | 1   | 1   | 1       | 1        |
| 105   | 210    | Chr10-6  | rs29327991 | 10         | 38770868  | 1   | 1   | 1   | nr  | 1       | 1        |
| 98    | 211    | Chr10-7  | rs6382436  | 10         | 48405529  | 1   | 1   | 1   | 1   | 1       | 1        |
| 106   | 212    | Chr10-8  | rs29364962 | 10         | 57191368  | 1   | 1   | 1   | 1   | 1       | 1        |
| 99    | 213    | Chr10-9  | rs13480628 | 10         | 66700922  | 1   | 1   | 1   | 1   | 1       | 0        |
| 107   | 214    | Chr10-10 | rs13480641 | 10         | 69476909  | 1   | 1   | 1   | 1   | 1       | 1        |
| 100   | 215    | Chr10-11 | rs13480657 | 10         | 76175591  | 1   | 1   | 1   | 1   | 1       | 0        |
| 108   | 216    | Chr10-12 | rs13480660 | 10         | 77019281  | 1   | 1   | 1   | 1   | 1       | 0        |
| 109   | 217    | Chr10-13 | rs13480693 | 10         | 88365917  | 1   | 1   | 1   | 1   | 1       | 0        |
| 101   | 218    | Chr10-14 | rs13480706 | 10         | 91625255  | 1   | 1   | 1   | 1   | 1       | 0        |
| 110   | 219    | Chr10-15 | rs13480740 | 10         | 103515832 | 1   | 1   | 1   | 1   | 1       | 1        |
| 102   | 220    | Chr10-16 | rs13480749 | 10         | 105437651 | 1   | 1   | 1   | 1   | 1       | 1        |
| 111   | 221    | Chr10-17 | rs13480762 | 10         | 110233294 | 1   | 1   | 1   | 1   | 1       | 1        |
| 103   | 222    | Chr10-18 | rs29329210 | 10         | 112836909 | 1   | 1   | 1   | 1   | 1       | 1        |
| 112   | 223    | Chr10-19 | rs13480793 | 10         | 120465110 | 1   | 1   | 1   | 1   | 1       | 0        |
| 104   | 224    | Chr10-20 | rs3676330  | 10         | 127647104 | 1   | 1   | 1   | 1   | 1       | 1        |
| 161   | 225    | Chr11-1  | rs13480864 | 11         | 9452733   | 1   | 1   | 0.5 | 1   | 1       | 1        |
| 113   | 226    | Chr11-2  | rs6211409  | 11         | 14121211  | 1   | 1   | 1   | 1   | 1       | 0        |
| 162   | 227    | Chr11-3  | rs13480906 | 11         | 21938817  | 1   | 1   | 1   | 1   | 1       | 1        |
| 114   | 228    | Chr11-4  | rs13480937 | 11         | 30059387  | 1   | 1   | 1   | 1   | 1       | 0        |
| 163   | 229    | Chr11-5  | rs13480971 | 11         | 37065962  | 1   | 1   | 1   | 1   | 1       | 0        |
| 115   | 230    | Chr11-6  | rs13480992 | 11         | 45632883  | 1   | 1   | 1   | 1   | 1       | 1        |
| 164   | 231    | Chr11-7  | rs13459130 | 11         | 54080664  | 1   | 1   | 1   | 1   | 1       | 1        |
| 116   | 232    | Chr11-8  | rs13481048 | 11         | 58775634  | 1   | 1   | 1   | 1   | 1       | 1        |
| 165   | 233    | Chr11-9  | rs13481070 | 11         | 64909099  | 1   | 1   | 1   | 1   | 1       | 0        |
| 117   | 234    | Chr11-10 | rs6197743  | 11         | 69990882  | 1   | 1   | 1   | 1   | 1       | 1        |
| 166   | 235    | Chr11-11 | rs13481105 | 11         | 75460557  | 1   | 1   | 1   | 1   | 1       | 0        |
| 118   | 236    | Chr11-12 | rs13481123 | 11         | 82070986  | 1   | 1   | 1   | 1   | 1       | 1        |
| 167   | 237    | Chr11-13 | rs13481154 | 11         | 90203180  | 1   | 1   | 1   | 1   | 1       | 0        |

| array | Marker | SNP ID   | Chr        | Start (bp) | 591       | 585 | 624 | 623 | 587 | NOD/LtJ | C57BL/6J |
|-------|--------|----------|------------|------------|-----------|-----|-----|-----|-----|---------|----------|
| 119   | 238    | Chr11-14 | rs13481176 | 11         | 97413258  | 1   | 1   | 1   | 1   | 1       | 0        |
| 168   | 239    | Chr11-15 | rs13481201 | 11         | 103038835 | 1   | 1   | 1   | 1   | 1       | 1        |
| 120   | 240    | Chr11-16 | rs13481219 | 11         | 107795749 | 1   | 1   | 0.5 | 1   | 1       | 0        |
| 41    | 241    | Chr11-17 | rs13481249 | 11         | 116402897 | 1   | 1   | 1   | 1   | 1       | 0        |
| 121   | 242    | Chr11-18 | rs6280170  | 11         | 120340622 | 1   | 1   | 1   | 1   | 1       | 1        |
| 122   | 243    | Chr12-1  | rs29199985 | 12         | 5407521   | 1   | 1   | 1   | 1   | 1       | 1        |
| 42    | 244    | Chr12-2  | rs13481294 | 12         | 9577137   | 1   | 1   | 1   | 1   | 1       | 0        |
| 123   | 245    | Chr12-3  | rs13481301 | 12         | 11672960  | 1   | 1   | 0.5 | 0.5 | 1       | 0        |
| 43    | 246    | Chr12-4  | rs13481350 | 12         | 25341610  | 1   | 1   | 0.5 | 0.5 | 1       | 1        |
| 124   | 247    | Chr12-5  | rs13481372 | 12         | 31085307  | 1   | 1   | 1   | 1   | 1       | 1        |
| 44    | 248    | Chr12-6  | rs29204715 | 12         | 34740768  | 0.5 | 0.5 | 0.5 | 0.5 | 0.5     | 1        |
| 125   | 249    | Chr12-7  | rs13481406 | 12         | 40661366  | 0.5 | 0.5 | 0.5 | 0.5 | 0.5     | 0        |
| 45    | 250    | Chr12-8  | rs13481431 | 12         | 47902411  | 1   | 1   | 1   | 1   | 1       | 0        |
| 126   | 251    | Chr12-9  | rs33845879 | 12         | 55866589  | 0.5 | 0.5 | 0.5 | 0.5 | 0.5     | 0        |
| 46    | 252    | Chr12-10 | rs13481489 | 12         | 62634264  | 0.5 | 0.5 | 0.5 | 0.5 | 0.5     | 1        |
| 127   | 253    | Chr12-11 | rs13481515 | 12         | 71027098  | 1   | 1   | 1   | 1   | 1       | 1        |
| 47    | 254    | Chr12-12 | rs8259450  | 12         | 75043079  | 0.5 | 0.5 | 0.5 | 1   | 0.5     | 1        |
| 128   | 255    | Chr12-13 | rs29152777 | 12         | 83974583  | 1   | 1   | 1   | 1   | 1       | 0        |
| 48    | 256    | Chr12-14 | rs13481583 | 12         | 91589325  | 1   | 1   | 1   | 1   | 1       | 0        |
| 129   | 257    | Chr12-15 | rs13481618 | 12         | 103766712 | 1   | 1   | 1   | 1   | 1       | 1        |
| 105   | 258    | Chr12-16 | rs13481627 | 12         | 106109309 | 1   | 1   | 0.5 | 1   | 1       | 0        |
| 130   | 259    | Chr12-17 | rs6176416  | 12         | 112919383 | 1   | 1   | 1   | 1   | 1       | 0        |
| 106   | 260    | Chr12-18 | rs13481659 | 12         | 114730692 | 1   | 1   | 1   | 1   | 1       | 1        |
| 107   | 261    | Chr13-1  | rs6277459  | 13         | 9749397   | 1   | 1   | 1   | 1   | 1       | 0        |
| 131   | 262    | Chr13-2  | rs13481708 | 13         | 16818885  | 1   | 1   | 1   | 1   | 1       | 0        |
| 108   | 263    | Chr13-3  | rs13481718 | 13         | 19919702  | 1   | 1   | 1   | 1   | 1       | 1        |
| 132   | 264    | Chr13-4  | rs13481740 | 13         | 30769382  | 1   | 1   | 1   | 1   | 1       | 1        |
| 109   | 265    | Chr13-5  | rs13481767 | 13         | 37610928  | 1   | 1   | 1   | 1   | 1       | 1        |
| 133   | 266    | Chr13-6  | rs3688207  | 13         | 45454657  | 1   | 1   | 1   | 1   | 1       | 1        |
| 110   | 267    | Chr13-7  | rs29533855 | 13         | 47339591  | 1   | 1   | 1   | 1   | 1       | 0        |
| 134   | 268    | Chr13-8  | rs13481828 | 13         | 58152623  | 1   | 1   | 1   | 1   | 1       | 1        |
| 111   | 269    | Chr13-9  | rs29879705 | 13         | 61062538  | 1   | 1   | 1   | 1   | 1       | 0        |
| 135   | 270    | Chr13-10 | rs13481866 | 13         | 70083586  | 1   | 1   | 1   | 1   | 1       | 0        |
| 112   | 271    | Chr13-11 | rs13481887 | 13         | 76470779  | 1   | 1   | 1   | 1   | 1       | 0        |
| 136   | 272    | Chr13-12 | rs6245977  | 13         | 85699164  | 1   | 1   | 1   | 1   | 1       | 1        |
| 169   | 273    | Chr13-13 | rs13481942 | 13         | 92011615  | 1   | 1   | 1   | 1   | 1       | 1        |
| 137   | 274    | Chr13-14 | rs13481967 | 13         | 99462341  | 1   | 1   | 1   | 1   | 1       | 0        |
| 170   | 275    | Chr13-15 | rs13481979 | 13         | 103343044 | 1   | 1   | 1   | 1   | 1       | 1        |
| 138   | 276    | Chr13-16 | rs30072381 | 13         | 109231972 | 1   | 1   | 0.5 | 1   | 1       | 1        |
| 171   | 277    | Chr13-17 | rs13482027 | 13         | 116327508 | 1   | 1   | 1   | 1   | 1       | 0        |
| 139   | 278    | Chr13-18 | rs6412462  | 13         | 119764543 | 1   | 1   | 1   | 1   | 1       | 0        |
| 172   | 279    | Chr14-1  | rs13482048 | 14         | 9848946   | 1   | 1   | 1   | 1   | 1       | 0        |
| 140   | 280    | Chr14-2  | rs13482072 | 14         | 16563741  | 1   | 1   | 1   | 1   | 1       | 1        |
| 173   | 281    | Chr14-3  | rs13482097 | 14         | 24572106  | 1   | 1   | 1   | 1   | 1       | 0        |
| 141   | 282    | Chr14-4  | rs13482110 | 14         | 28588757  | 1   | 1   | 0.5 | 1   | 1       | 0        |
| 174   | 283    | Chr14-5  | rs13482135 | 14         | 36200743  | 1   | 1   | 1   | 1   | 1       | 1        |
| 142   | 284    | Chr14-6  | rs13482143 | 14         | 40378548  | 1   | 1   | 1   | 1   | 1       | 0        |
| 175   | 285    | Chr14-7  | rs13482176 | 14         | 51060859  | 1   | 1   | 1   | 1   | 1       | 1        |
| 143   | 286    | Chr14-8  | rs13482202 | 14         | 59404366  | 1   | 1   | 1   | 1   | 1       | 1        |
| 176   | 287    | Chr14-9  | rs3725809  | 14         | 64867471  | 1   | 1   | 1   | 1   | 1       | 1        |
| 144   | 288    | Chr14-10 | rs13482246 | 14         | 71920113  | 1   | 1   | 1   | 1   | 1       | 0        |
| 49    | 289    | Chr14-11 | rs13482266 | 14         | 79556856  | 1   | 1   | 1   | 1   | 1       | 1        |
| 145   | 290    | Chr14-12 | rs13482284 | 14         | 86615894  | 1   | 1   | 1   | 1   | 1       | 0        |
| 50    | 291    | Chr14-13 | rs6334493  | 14         | 100286465 | 1   | 1   | 1   | 1   | 1       | 1        |
| 146   | 292    | Chr14-14 | rs13482339 | 14         | 101401164 | 1   | 1   | 1   | 1   | 1       | 1        |
| 51    | 293    | Chr14-15 | rs13482368 | 14         | 110905420 | 1   | 1   | 1   | 1   | 1       | 0        |
| 147   | 294    | Chr14-16 | rs13482393 | 14         | 119128126 | 1   | 1   | 1   | 1   | 1       | 0        |
| 52    | 295    | Chr14-17 | rs4230603  | 14         | 121343810 | 1   | 1   | 1   | 1   | 1       | 0        |
| 148   | 296    | Chr14-18 | rs4230609  | 14         | 121682448 | 1   | 1   | 1   | 1   | 1       | 1        |
| 53    | 297    | Chr15-1  | rs13482429 | 15         | 10505267  | 1   | 1   | 0.5 | 1   | 1       | 0        |
| 149   | 298    | Chr15-2  | rs13482442 | 15         | 14008099  | 1   | 1   | 1   | 1   | 1       | 0        |
| 54    | 299    | Chr15-3  | rs13482477 | 15         | 22448960  | 1   | 1   | 1   | 1   | 1       | 1        |
| 150   | 300    | Chr15-4  | rs13482497 | 15         | 28251498  | 1   | 1   | 1   | 1   | 1       | 1        |
| 55    | 301    | Chr15-5  | rs6153770  | 15         | 35056255  | 1   | 1   | 1   | 1   | 1       | 0        |
| 151   | 302    | Chr15-6  | rs13482536 | 15         | 41700828  | 1   | 1   | 1   | 1   | 1       | 0        |
| 56    | 303    | Chr15-7  | rs13482563 | 15         | 48437257  | 1   | 1   | 1   | 1   | 1       | 1        |
| 152   | 304    | Chr15-8  | rs13482572 | 15         | 50042767  | 1   | 1   | 1   | 1   | 1       | 1        |
| 153   | 305    | Chr15-9  | rs13482590 | 15         | 54944934  | 1   | 1   | 1   | 1   | 1       | 1        |
| 113   | 306    | Chr15-10 | rs13482618 | 15         | 65690150  | 1   | 1   | 1   | 1   | 1       | 0        |
| 154   | 307    | Chr15-11 | rs6169611  | 15         | 70046283  | 1   | 1   | 1   | 1   | 1       | 0        |
| 114   | 308    | Chr15-12 | rs4230847  | 15         | 78605289  | 1   | 1   | 1   | 1   | 1       | 1        |
| 155   | 309    | Chr15-13 | rs13482682 | 15         | 84449486  | 1   | 1   | 1   | 1   | 1       | 0        |
| 115   | 310    | Chr15-14 | rs13482701 | 15         | 89705712  | 1   | 1   | 0.5 | 1   | 1       | 0        |
| 156   | 311    | Chr15-15 | rs13482713 | 15         | 92378560  | 1   | 1   | 1   | 1   | 1       | 0        |
| 116   | 312    | Chr15-16 | rs13482744 | 15         | 101380978 | 1   | 1   | 1   | 1   | 1       | 1        |
| 157   | 313    | Chr16-1  | rs4152386  | 16         | 3987018   | 1   | 1   | 1   | 1   | 1       | 1        |
| 117   | 314    | Chr16-2  | rs4154322  | 16         | 6124729   | 1   | 1   | 1   | 1   | 1       | 1        |
| 158   | 315    | Chr16-3  | rs4163487  | 16         | 13677988  | 1   | 1   | 1   | 1   | 1       | 1        |
| 118   | 316    | Chr16-4  | rs4165081  | 16         | 19883172  | 1   | 1   | 1   | 1   | 1       | 1        |

| array | Marker | SNP ID   | Chr        | Start (bp) | 591       | 585 | 624 | 623 | 587 | NOD/LtJ | C57BL/6J |
|-------|--------|----------|------------|------------|-----------|-----|-----|-----|-----|---------|----------|
| 159   | 317    | Chr16-5  | rs4165334  | 16         | 23467678  | 1   | 1   | 1   | 1   | 1       | 0        |
| 119   | 318    | Chr16-6  | rs3666382  | 16         | 34212148  | 1   | 1   | 1   | 1   | 1       | 1        |
| 160   | 319    | Chr16-7  | rs4178870  | 16         | 42031091  | 1   | 1   | 1   | 1   | 1       | 1        |
| 120   | 320    | Chr16-8  | rs4183630  | 16         | 47373559  | 1   | 1   | 1   | 1   | 1       | 1        |
| 161   | 321    | Chr16-9  | rs4186801  | 16         | 51465652  | 1   | 1   | 1   | 1   | 1       | 0        |
| 177   | 322    | Chr16-10 | rs4194384  | 16         | 62450621  | 1   | 1   | 1   | 1   | 1       | 1        |
| 162   | 323    | Chr16-11 | rs4198331  | 16         | 68115290  | 1   | 1   | 1   | 1   | 1       | 1        |
| 178   | 324    | Chr16-12 | rs4208724  | 16         | 78685266  | 1   | 1   | 1   | 1   | 1       | 0        |
| 163   | 325    | Chr16-13 | rs4212481  | 16         | 85641478  | 1   | 1   | 1   | 1   | 1       | 0        |
| 179   | 326    | Chr16-14 | rs4220668  | 16         | 94891033  | 1   | 1   | 1   | 1   | 1       | 0        |
| 180   | 327    | Chr17-1  | rs13482863 | 17         | 9351887   | 1   | 1   | 1   | 1   | 1       | 1        |
| 164   | 328    | Chr17-2  | rs13482864 | 17         | 9565936   | 1   | 1   | 1   | 1   | 1       | 1        |
| 181   | 329    | Chr17-3  | rs13482921 | 17         | 24109788  | 1   | 1   | 1   | 1   | 1       | 1        |
| 165   | 330    | Chr17-4  | rs6358703  | 17         | 28916155  | 1   | 1   | 1   | 1   | 1       | 0        |
| 182   | 331    | Chr17-5  | rs3023110  | 17         | 33517718  | 1   | 1   | 1   | 1   | 1       | 1        |
| 166   | 332    | Chr17-6  | rs13482980 | 17         | 40555049  | 1   | 1   | 1   | 1   | 1       | 1        |
| 183   | 333    | Chr17-7  | rs4231532  | 17         | 47957927  | 1   | 1   | 1   | 1   | 1       | 1        |
| 167   | 334    | Chr17-8  | rs13483029 | 17         | 52485097  | 1   | 1   | 1   | 1   | 1       | 0        |
| 184   | 335    | Chr17-9  | rs13483058 | 17         | 61680643  | 1   | 1   | 1   | 1   | 1       | 0        |
| 168   | 336    | Chr17-10 | rs6399089  | 17         | 68482570  | 1   | 1   | 1   | 1   | 1       | 1        |
| 57    | 337    | Chr17-11 | rs13483117 | 17         | 79240322  | 1   | 1   | 1   | 1   | 1       | 0        |
| 169   | 338    | Chr17-12 | rs6158628  | 17         | 82052484  | 1   | 1   | 1   | 1   | 1       | 1        |
| 58    | 339    | Chr17-13 | rs13483160 | 17         | 90557266  | 1   | 1   | 1   | 1   | 1       | 0        |
| 170   | 340    | Chr17-14 | rs13483174 | 17         | 93935624  | 1   | 1   | 1   | 1   | 1       | 0        |
| 59    | 341    | Chr18-1  | rs6224965  | 18         | 5079849   | 1   | 1   | 1   | 1   | 1       | 1        |
| 171   | 342    | Chr18-2  | rs13483238 | 18         | 19542414  | 1   | 1   | 1   | 1   | 1       | 0        |
| 60    | 343    | Chr18-3  | rs13483253 | 18         | 23959739  | 1   | 1   | 1   | 1   | 1       | 0        |
| 172   | 344    | Chr18-4  | rs13483278 | 18         | 30610888  | 1   | 1   | 1   | 1   | 1       | 0        |
| 61    | 345    | Chr18-5  | rs13483308 | 18         | 38428528  | 1   | 1   | 1   | 1   | 1       | 1        |
| 173   | 346    | Chr18-6  | rs6157163  | 18         | 44702560  | 1   | 1   | 1   | 1   | 1       | 0        |
| 174   | 347    | Chr18-7  | rs13483358 | 18         | 50847061  | 1   | 1   | 1   | 1   | 1       | 0        |
| 62    | 348    | Chr18-8  | rs13483365 | 18         | 53553182  | 1   | 1   | 1   | 1   | 1       | 1        |
| 175   | 349    | Chr18-9  | rs6338896  | 18         | 58717533  | 1   | 1   | 1   | 1   | 1       | 1        |
| 63    | 350    | Chr18-10 | rs13483401 | 18         | 63939575  | 1   | 1   | 1   | 1   | 1       | 1        |
| 176   | 351    | Chr18-11 | rs29768513 | 18         | 70944925  | 1   | 0.5 | 0.5 | 0.5 | 1       | 0        |
| 64    | 352    | Chr18-12 | rs3705890  | 18         | 77108823  | 1   | 1   | 1   | 1   | 1       | 1        |
| 177   | 353    | Chr18-13 | rs13483466 | 18         | 82409998  | 1   | 1   | 1   | 1   | 1       | 1        |
| 121   | 354    | Chr18-14 | rs13483497 | 18         | 90273335  | 1   | 1   | 1   | 1   | 1       | 1        |
| 178   | 355    | Chr19-1  | rs13483526 | 19         | 10670708  | 1   | 1   | 1   | 1   | 1       | 0        |
| 122   | 356    | Chr19-2  | rs13483548 | 19         | 17844682  | 1   | 1   | 1   | 1   | 1       | 0        |
| 179   | 357    | Chr19-3  | rs4232111  | 19         | 24047254  | 1   | 1   | 1   | 1   | 1       | 1        |
| 123   | 358    | Chr19-4  | rs6238842  | 19         | 30355837  | 1   | 1   | 1   | 1   | 1       | 1        |
| 180   | 359    | Chr19-5  | rs13483605 | 19         | 35692493  | 1   | 1   | 1   | 1   | 1       | 1        |
| 124   | 360    | Chr19-6  | rs13483642 | 19         | 45215423  | 1   | 1   | 1   | 1   | 1       | 1        |
| 181   | 361    | Chr19-7  | rs13483665 | 19         | 51255209  | 1   | 1   | 1   | 1   | 1       | 0        |
| 125   | 362    | Chr19-8  | rs13483695 | 19         | 59315566  | 1   | 1   | 1   | 1   | 1       | 1        |
| 126   | 363    | ChrX-1   | rs13483704 | X          | 7560445   | 1   | 1   | 1   | 1   | 1       | 1        |
| 182   | 364    | ChrX-2   | rs13483715 | X          | 9788448   | 1   | 1   | 1   | 1   | 1       | 1        |
| 127   | 365    | ChrX-3   | rs13483718 | X          | 10778885  | 1   | 1   | 1   | 1   | 1       | 1        |
| 183   | 366    | ChrX-4   | rs13483722 | X          | 19873182  | 1   | 1   | 1   | 1   | 1       | 0        |
| 128   | 367    | ChrX-5   | rs13483730 | X          | 39577867  | 1   | 1   | 1   | 1   | 1       | 1        |
| 184   | 368    | ChrX-6   | rs33872015 | X          | 40335088  | 1   | 1   | 1   | 1   | 1       | 1        |
| 185   | 369    | ChrX-7   | rs13483756 | X          | 50304196  | 1   | 1   | 1   | 1   | 1       | 1        |
| 185   | 370    | ChrX-8   | rs13483770 | X          | 56488675  | 1   | 1   | 1   | 1   | 1       | 0        |
| 186   | 371    | ChrX-9   | rs13483807 | X          | 66136453  | 1   | 1   | 1   | 1   | 1       | 0        |
| 186   | 372    | ChrX-10  | rs13483818 | X          | 69187248  | 1   | 1   | 1   | 1   | 1       | 0        |
| 187   | 373    | ChrX-11  | rs13483863 | X          | 80517265  | 1   | 1   | 1   | 1   | 1       | 1        |
| 187   | 374    | ChrX-12  | rs13483878 | X          | 84490778  | 1   | 1   | 1   | 1   | 1       | 1        |
| 188   | 375    | ChrX-13  | rs13483898 | X          | 95119353  | 1   | 1   | 1   | 1   | 1       | 1        |
| 188   | 376    | ChrX-14  | rs13483926 | X          | 103283749 | 1   | 1   | 1   | 1   | 1       | 1        |
| 189   | 377    | ChrX-15  | rs13483954 | X          | 112067339 | nr  | nr  | nr  | nr  | nr      | 1        |
| 189   | 378    | ChrX-16  | rs13483990 | X          | 126823460 | 1   | 1   | 1   | 1   | 1       | 0        |
| 190   | 379    | ChrX-17  | rs29264998 | X          | 133125033 | 1   | 1   | 1   | 1   | 1       | 0        |
| 190   | 380    | ChrX-18  | rs13459159 | X          | 136345220 | 1   | 1   | 1   | 1   | 1       | 0        |
| 191   | 381    | ChrX-19  | rs13484072 | X          | 146748154 | 1   | 1   | 1   | 1   | 1       | 0        |
| 191   | 382    | ChrX-20  | rs13484075 | X          | 149936656 | 1   | 1   | 1   | 1   | 1       | 0        |
| 192   | 383    | ChrX-21  | rs13484098 | X          | 158023555 | 1   | 1   | 1   | 1   | 1       | 1        |
| 192   | 384    | ChrX-22  | rs13484113 | X          | 165892683 | 1   | 1   | 1   | 1   | 1       | 0        |

|        |       |       |       |       |        |       |  |  |  |  |  |
|--------|-------|-------|-------|-------|--------|-------|--|--|--|--|--|
| % NOD: |       |       |       |       |        |       |  |  |  |  |  |
| 98.03  | 98.03 | 97.77 | 96.85 | 99.08 | 100.00 | 45.05 |  |  |  |  |  |

Average Percentage:
